# Supplementary material for: Low-temperature catalytic oxidation of CO over highly active mesoporous Pd/CeO2–ZrO2–Al2O3catalyst
Source: Royal Society of Chemistry journal article supplement (doi:10.1039/c6ra05193f), 2016-01-01
Supplement: c6ra05193f1.pdf [file c6ra05193f1.pdf]

Electronic Supplementary Information (ESI):

**Low-temperature Catalytic Oxidation of CO over Highly Active  
Mesoporous Pd/CeO<sub>2</sub>-ZrO<sub>2</sub>-Al<sub>2</sub>O<sub>3</sub> Catalyst**

Xin Liu, Ping Ning, Lisi Xu, Qixian Liu, Zhongxian Song, Qiulin Zhang\*

*Faculty of Environmental Science and Engineering, Kunming University of Science  
and Technology, Kunming, 650500, PR China.*

**S 1 catalysts preparation and Characterization**

**S 1.1 Preparation of CeO<sub>2</sub>-ZrO<sub>2</sub>-Al<sub>2</sub>O<sub>3</sub>-PVP, CeO<sub>2</sub>-ZrO<sub>2</sub>-Al<sub>2</sub>O<sub>3</sub>-P123 and CeO<sub>2</sub>-ZrO<sub>2</sub>-Al<sub>2</sub>O<sub>3</sub>-CTAB**

3.5 g of the surfactant (one of the PVP, P123 or CTAB), 0.009 mol of cerium nitrate, 0.009 mol of zirconium nitrate, 0.002 mol of aluminum nitrate and urea (0.08 mol) were sequentially dissolved into 200 ml of deionized water at 60 °C. The resulted solution was then transferred to stainless steel Teflon-lined autoclaves and heated at 140 °C for 12 h. The final products were washed with distilled water, dried at 100 °C and calcined at 425 °C for 3 h in static air with heating rate of 3 °C/min. As-prepared solids are denoted with CeO<sub>2</sub>-ZrO<sub>2</sub>-Al<sub>2</sub>O<sub>3</sub>-PVP, CeO<sub>2</sub>-ZrO<sub>2</sub>-Al<sub>2</sub>O<sub>3</sub>-P123, and CeO<sub>2</sub>-ZrO<sub>2</sub>-Al<sub>2</sub>O<sub>3</sub>-CTAB respectively.

**S 1.2 Preparation of Pd/CeO<sub>2</sub>-ZrO<sub>2</sub>-Al<sub>2</sub>O<sub>3</sub>-PVP, Pd/CeO<sub>2</sub>-ZrO<sub>2</sub>-Al<sub>2</sub>O<sub>3</sub>-P123 and Pd/CeO<sub>2</sub>-ZrO<sub>2</sub>-Al<sub>2</sub>O<sub>3</sub>-CTAB**

CeO<sub>2</sub>-ZrO<sub>2</sub>-Al<sub>2</sub>O<sub>3</sub>-PVP, CeO<sub>2</sub>-ZrO<sub>2</sub>-Al<sub>2</sub>O<sub>3</sub>-P123, and CeO<sub>2</sub>-ZrO<sub>2</sub>-Al<sub>2</sub>O<sub>3</sub>-CTAB supported Pd catalysts were prepared by the wet impregnation method using aqueous solution of palladium nitrate as precursor with Pd content of 1% (wt %). The impregnated samples were dried at 60 °C and calcined at 350 °C for 2 h. The catalysts are denoted as Pd/CeO<sub>2</sub>-ZrO<sub>2</sub>-Al<sub>2</sub>O<sub>3</sub>-PVP, Pd/CeO<sub>2</sub>-ZrO<sub>2</sub>-Al<sub>2</sub>O<sub>3</sub>-P123, and Pd/CeO<sub>2</sub>-

ZrO<sub>2</sub>-Al<sub>2</sub>O<sub>3</sub>-CTAB respectively.

### S1.3 H<sub>2</sub>-temperature programmed reduction (H<sub>2</sub>-TPR) analyses

H<sub>2</sub>-temperature programmed reduction (H<sub>2</sub>-TPR) analyses were carried out in a quartz tube reactor (i.d. 3.0 mm). 50 mg of the samples (60 - 80 mesh) was pre-treated under N<sub>2</sub> flow at 350 °C for 1 h and then cooled to room temperature. The N<sub>2</sub> flow was then shifted to the flow of H<sub>2</sub>/Ar (5 vol. % of H<sub>2</sub>, 30 ml/min) to balance for a while. The quartz tube reactor was heated with a linear heating rate of 8 °C/min. A thermal conductivity detector (TCD) was used to record the consumption of H<sub>2</sub> signals.

## S 2 Results and Discussions

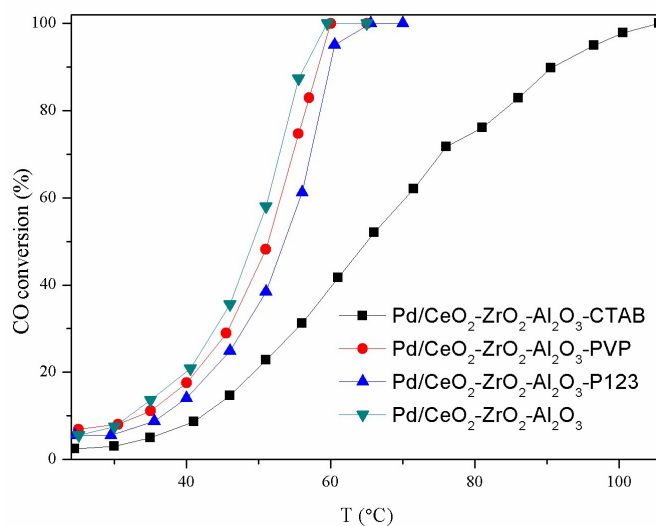

**Fig. S1 catalytic activity of CO conversion over different samples (1.0 vol. % CO, 10.5 vol. % O<sub>2</sub>, N<sub>2</sub> balanced, with the total flow rate of 50 ml/min and GHSV of 15000 ml·g<sup>-1</sup>·h<sup>-1</sup>)**

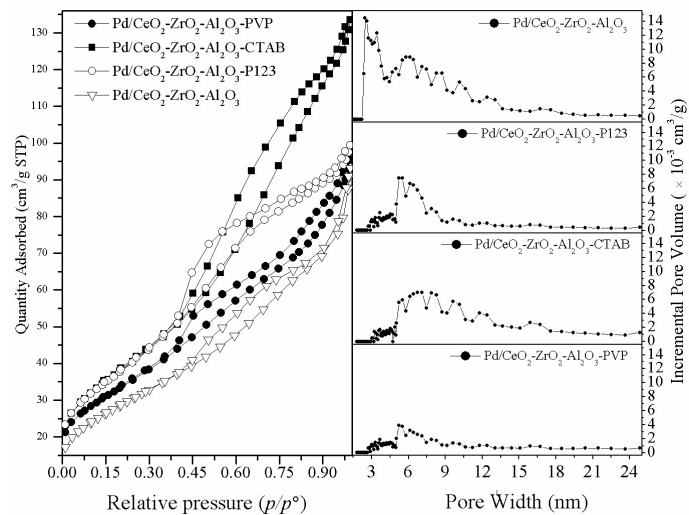

**Fig. S2** N<sub>2</sub>-adsorption and desorption isotherms and NL-DFT pore size distributions over Pd/CeO<sub>2</sub>-ZrO<sub>2</sub>-Al<sub>2</sub>O<sub>3</sub> prepared from different commercial surfactants.

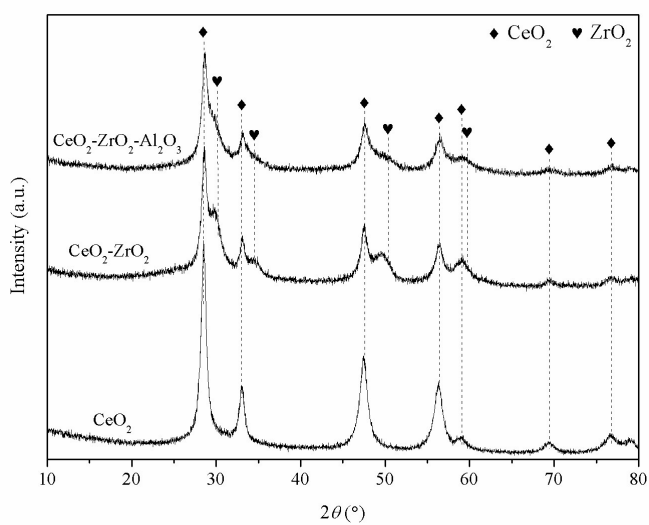

**Fig. S3** XRD patterns of various parent supports.

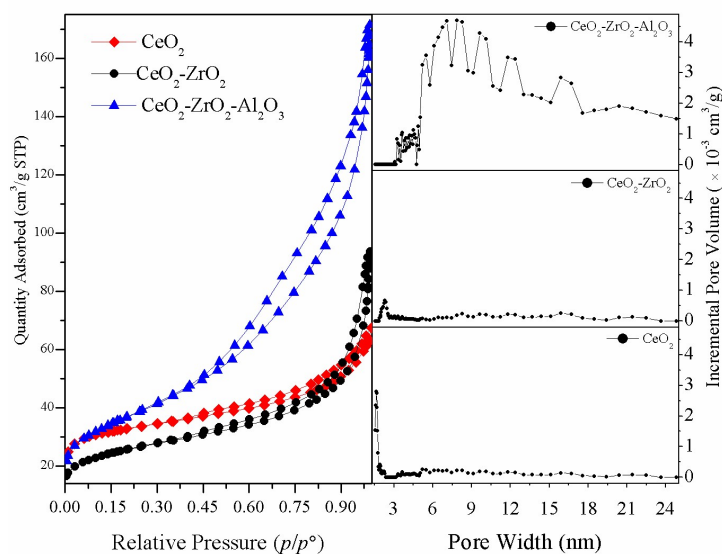

**Fig. S4** N<sub>2</sub> adsorption-desorption isotherms and pore size distribution of various parent supports.

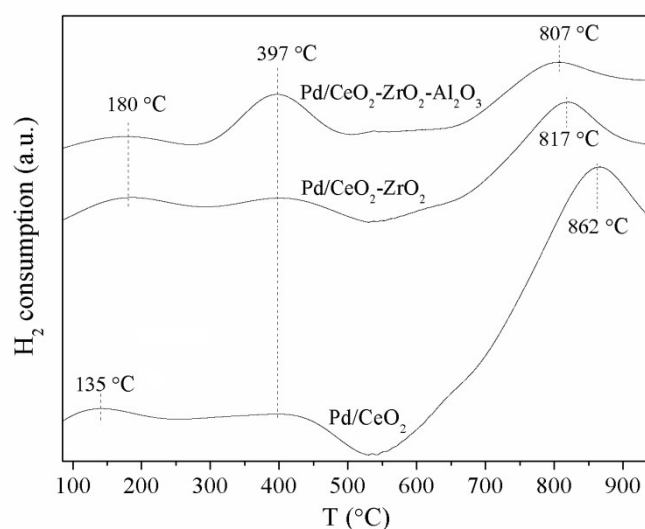

**Fig. S5** H<sub>2</sub>-TPR profiles of the various catalysts.

**Table S1** Volumes of micropore, mesopore and total pore volumes

| Samples                                                               | Micropore volumes                 | Mesopore volumes                  | Total pore                                |
|-----------------------------------------------------------------------|-----------------------------------|-----------------------------------|-------------------------------------------|
|                                                                       | <sup>a</sup> (cm <sup>3</sup> /g) | <sup>b</sup> (cm <sup>3</sup> /g) | volumes <sup>c</sup> (cm <sup>3</sup> /g) |
| Pd/CeO <sub>2</sub>                                                   | 0.0394                            | 0.0446                            | 0.0949                                    |
| Pd/CeO <sub>2</sub> -ZrO <sub>2</sub>                                 | 0.0384                            | 0.0766                            | 0.133                                     |
| Pd/CeO <sub>2</sub> -ZrO <sub>2</sub> -Al <sub>2</sub> O <sub>3</sub> | 0.0258                            | 0.101                             | 0.144                                     |

<sup>a</sup> Calculated from pore volumes in pore size < 1.987 nm by NL-DFT method.

<sup>b</sup> Calculated from pore volumes in pore size between 1.987 and 45 nm by NL-DFT method.

<sup>c</sup> Single point adsorption total pore volume of pore diameters less than 189 nm at  $p/p^0 = 0.995$

**Table S2** Proportion of micropore and mesopore

| Samples                                                               | $R_{micro}$ <sup>a</sup> (%) | $R_{micro/total}$ <sup>b</sup> (%) | $R_{meso/total}$ <sup>c</sup> (%) |
|-----------------------------------------------------------------------|------------------------------|------------------------------------|-----------------------------------|
| Pd/CeO <sub>2</sub>                                                   | 46.93                        | 41.55                              | 46.99                             |
| Pd/CeO <sub>2</sub> -ZrO <sub>2</sub>                                 | 33.38                        | 28.88                              | 57.63                             |
| Pd/CeO <sub>2</sub> -ZrO <sub>2</sub> -Al <sub>2</sub> O <sub>3</sub> | 20.35                        | 17.92                              | 70.14                             |

$${}^a R_{micro} = \frac{\text{micropore volumes}}{\text{micropore volumes} + \text{mesopore volumes}} \times 100$$

$${}^b R_{micro/total} = \frac{\text{micropore volumes}}{\text{Total pore volumes}} \times 100$$

$${}^c R_{meso/total} = \frac{\text{mesopore volumes}}{\text{Total pore volumes}} \times 100$$

**Table S3** Total pore volume, SSA and pore size over different samples with the same composition

| Samples                                                                     | Total pore volume <sup>a</sup><br>(cm <sup>3</sup> /g) | SSA<br>(m <sup>2</sup> /g) | Average pore <sup>b</sup><br>size (nm) |
|-----------------------------------------------------------------------------|--------------------------------------------------------|----------------------------|----------------------------------------|
| Pd/CeO <sub>2</sub> -ZrO <sub>2</sub> -Al <sub>2</sub> O <sub>3</sub> -PVP  | 0.148                                                  | 103                        | 5.7                                    |
| Pd/CeO <sub>2</sub> -ZrO <sub>2</sub> -Al <sub>2</sub> O <sub>3</sub> -CTAB | 0.207                                                  | 122                        | 6.7                                    |
| Pd/CeO <sub>2</sub> -ZrO <sub>2</sub> -Al <sub>2</sub> O <sub>3</sub> -P123 | 0.155                                                  | 121                        | 5.2                                    |
| Pd/CeO <sub>2</sub> -ZrO <sub>2</sub> -Al <sub>2</sub> O <sub>3</sub>       | 0.144                                                  | 105                        | 5.5                                    |

<sup>a</sup> calculated from Adsorption average pore diameter (4V/A) by BET

<sup>b</sup> Single point adsorption total pore volume of pore diameters less than 189 nm at  $p/p^0 = 0.995$

**Table S4** Surface atomic concentration over different samples

| Samples                                                               | Surface atomic concentration (%) |      |       |                |       |
|-----------------------------------------------------------------------|----------------------------------|------|-------|----------------|-------|
|                                                                       | O                                | Al   | Zr    | Pd             | Ce    |
| Pd/CeO <sub>2</sub> -ZrO <sub>2</sub> -Al <sub>2</sub> O <sub>3</sub> | 63.36                            | 4.79 | 10.14 | 0 <sup>a</sup> | 21.71 |
| Pd/CeO <sub>2</sub> -ZrO <sub>2</sub>                                 | 66.36                            | -    | 19.96 | 0 <sup>a</sup> | 13.68 |
| Pd/CeO <sub>2</sub>                                                   | 63.67                            | -    | -     | 1.98           | 34.35 |

<sup>a</sup> Surface Pd species over Pd/CeO<sub>2</sub>-ZrO<sub>2</sub> and Pd/CeO<sub>2</sub>-ZrO<sub>2</sub>-Al<sub>2</sub>O<sub>3</sub> could not be quantitatively analyzed as XPS peaks of Pd 3d and Zr 3p orbitals are much close.

Comparing with XPS peaks of Pd 3d orbital, influence of higher intensity of Zr 3p orbital makes it hard to quantitatively analyze surface atomic concentration of surface palladium species.
